# Supplementary material for: The Impact of Computerized Accounting Information System on the Performance of SMS Business Enterprises in Burao District
Source: Preprints.org preprint supplement (doi:10.20944/preprints202407.2026.v1), 2024-07-25
Supplement: Supplementary file 1 [file supplementary]

RESEARCH TITLE:

**The Impact of Computerized Accounting Information System on the Performance of SMS Business Enterprises in Burao District**

**Sumitted By:**

**Saed Ahmed Mohamed**

Email: [jamam4477@gmail.com](mailto:jamam4477@gmail.com)

Advisor:

Abdi Farah Elmi

Email: [abdifarah29@hotmail.com](mailto:abdifarah29@hotmail.com)

*August, 2022*

***COPY RIGHT PAGE***

*All material contained within this thesis, including without limitation text, logos, icons, photographs, and all other artwork, is copyright material of The Author unless otherwise stated. Use may be made of any material contained within the thesis for non-commercial purposes from the copyright holder.*

*Commercial use of material may only be made with the express, prior, written permission of The Author.*

***DECLARATION AND APPROVAL***

DECLARATION

*I’m hereby to declare that this submission is my own work and to the best of my knowledge and belief, it contains no material previously published or presented for an award of any other degree or diploma of the university and other institute of higher learning, except where due acknowledge has been made in the text and reference list.*

*Reseacher/s;*

*Saed Ahmed Mohamed Signature*

*This is to certify that this thesis is the bonfire work of Saed Ahmed Mohamed, carried out under the supervision.*

SUPERVISOR APPROVAL

*This research is the work of the student mentioned above and has been carried out with the supervision and approvals as the university research supervisor.*

*Signature…………………………………. Date………………………………*

*Abdiqadir Farah Elmi*

*As the member of the university examiners for the research proposals, I certify that I have read and evaluated the research prepared by the above-mentioned student [researcher], and I therefore recommend that the study be accepted as a fulfilling requirement for award of the Bachelor degree.*

*__________________________ ________________ _______________*

*Internal Examiner Signature Date*

***DEDICATION***

*My sincere dedication goes to my parents.*

*I am very passionately dedicating this work to my beloved parents who have supported and guided me throughout my life, as well as during the study period, and who have been the source of my strengths to continue with my further studies satisfactorily.*

*They have encouraged me to work hard without tiredness, and complete my studies in a successful manner.*

*Here, I heartily say:*

*“Dear Parents, I thank you a lot! You really played a great role and enabled me reach this far. May Allah, bless you, and grant you happiness and best reward for your deeds.”*

***CONSENT FOR PUBLICATION***

*I, Saed Ahmed Mohamed, hereby grant permission for this thesis to be published and made publicly available. I understand that the thesis will be accessible to others and may be referenced in future academic and professional work. I affirm that the content of this thesis represents my original research, and I consent to its publication for educational and research purposes.*

***AVAILABILITY OF DATA AND MATERIAL***

*The data and materials that support the findings of this study are available from the corresponding author, Saed Ahmed Mohamed, upon reasonable request. All data generated or analyzed during this research are included in this published thesis and are also available in supplementary materials.*

***COMPETING INTERESTS***

*The author declares that there are no competing interests regarding the publication of this thesis. No financial, personal, or professional conflicts influenced the research and writing of this thesis.*

***FUNDING***

*This research was conducted without any specific grant from funding agencies in the public, commercial, or not-for-profit sectors. All expenses related to the study were covered by the author personally.*

***AUTHORS' CONTRIBUTIONS***

*Saed Ahmed Mohamed was the sole author and researcher for this thesis. The author conceived and designed the study, collected and analyzed the data, and wrote and reviewed the manuscript. All aspects of the work have been approved by the author, who takes full responsibility for the content of this thesis.*

***ACKNOWLEDGEMENT***

*First and foremost, I would like to thank Almighty Allah for his guidance and protection since my early childhood up to now.*

*I would like to give heart-felt thanks to the following individuals for their varied contribution to the success of this Thesis.*

*My supervisor Pro. Abdulkadir Farah Elmi who gave all his valuable time to advice and guide me through the whole process of my research.*

*I cannot also forget to thank my dear family members -most especially my mother-. Let’s say ‘thank you all’.*

*I also recognize the inspiration and the support of my friends and colleagues who are always with me, pushing me to succeed.*

*I also appreciate the help of all other individuals I have not mentioned here. My Allah reward you for your support and encouragement.*
